# Supplementary material for: A specific dietary intervention to restore brain structure and function after ischemic stroke
Source: PubMed Central journal article supplement — Theranostics. 2017 Jan 6;7(2):493–512. doi: 10.7150/thno.17559 (PMC5327363; doi:10.7150/thno.17559), 2017-01-06
Supplement: thnov07p0493s1.pdf [file thnov07p0493s1.pdf]

## Supplementary Materials

### Results

#### Food intake and body weight (Nijmegen, The Netherlands)

Body weight (Supplemental figure 1A) of both dietary groups decreased poststroke ( $-9.8 \pm 1.3\%$ ,  $F(1,13)=54.0$ ,  $p < .001$ ), while it increased significantly over time, comparing the first with the second to fifth week poststroke in all mice ( $4.9 \pm 1.0\%$ ,  $F(1,13)=26.6$ ,  $p < .001$ ).

The daily food intake (Supplemental figure 1B) increased over time on both diets in all mice poststroke ( $F(1,12)=53.3$ ,  $p < .001$ ). Fortasyn diet tended to increase food intake compared to Control diet ( $F(1,12)=4.7$ ,  $p < .052$ ).

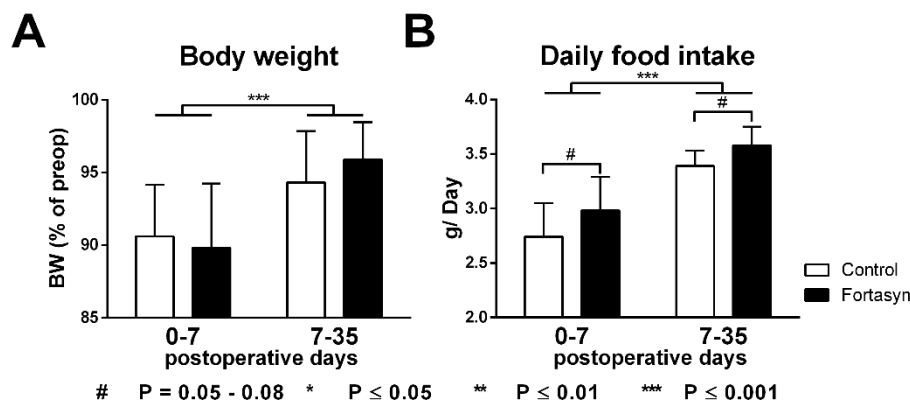

**Supplemental fig. 1. Body weight (BW) and daily food intake measured in the first week and second to fifth week after tMCAo in mice fed either Fortasyn or Control diet.** Values represent mean $\pm$ SD (#,  $0.05 < p < 0.08$  (tendency); \*,  $p \leq 0.05$ ; \*\*,  $p \leq 0.01$ ; \*\*\*,  $p \leq 0.001$ ). (A) Relative BW of both dietary groups decreased after tMCAo ( $-9.8 \pm 1.3\%$ ,  $p < .001$ ). Thereafter, BW increased significantly over time in all mice ( $4.9 \pm 1.0\%$ ,  $p < .001$ ). (B) Food intake increased over time on both diets in all mice ( $p < .001$ ). Mice on Fortasyn diet tended to eat more than mice on Control diet ( $p < .052$ ).

#### Rotarod (Nijmegen, The Netherlands)

The rotarod is used to measure motor coordination. Mice performed a motor task on a rotating rod at fixed speeds or acceleration at 8 and 21 days poststroke. The latency to fall was recorded. No significant effects between both dietary groups (data not shown) were revealed 8 and 21 days poststroke.

#### Prepulse inhibition (Nijmegen, The Netherlands)

Sensorimotor integration as measured with the prepulse inhibition test demonstrated no significant differences between both dietary groups (data not shown) 15 days poststroke. Moreover, both animal groups also did not demonstrate a habituation to the 120 dB pulses (data not shown).

#### Novel object recognition test (Nijmegen, The Netherlands)

We evaluated changes in cognitive function after 22 to 24 days poststroke. Therefore, mice were tested in the novel object recognition test. No diet effects were observed for the preference for the novel object (data not shown).

#### Resting state fMRI (Nijmegen, The Netherlands)

41  
 42 To compare functional connectivity (FC) patterns at 7 and 35 days poststroke and on different diets, rsfMRI data were statistically analyzed based on total (*Supplemental figure 2A-C*) in twelve ROI including: left and right dorsal hippocampus (DH), left and right ventral hippocampus (VH), left and right auditory cortex (AU), left and right motor cortex (M1), left and right somatosensory cortex (S1), and left and right visual cortex (V1).

47  
 48 *Total correlation analyses*

49  
 50 With total correlations no significant diet effects nor time effects (*Supplemental figure 2B,C*) were measured.

52

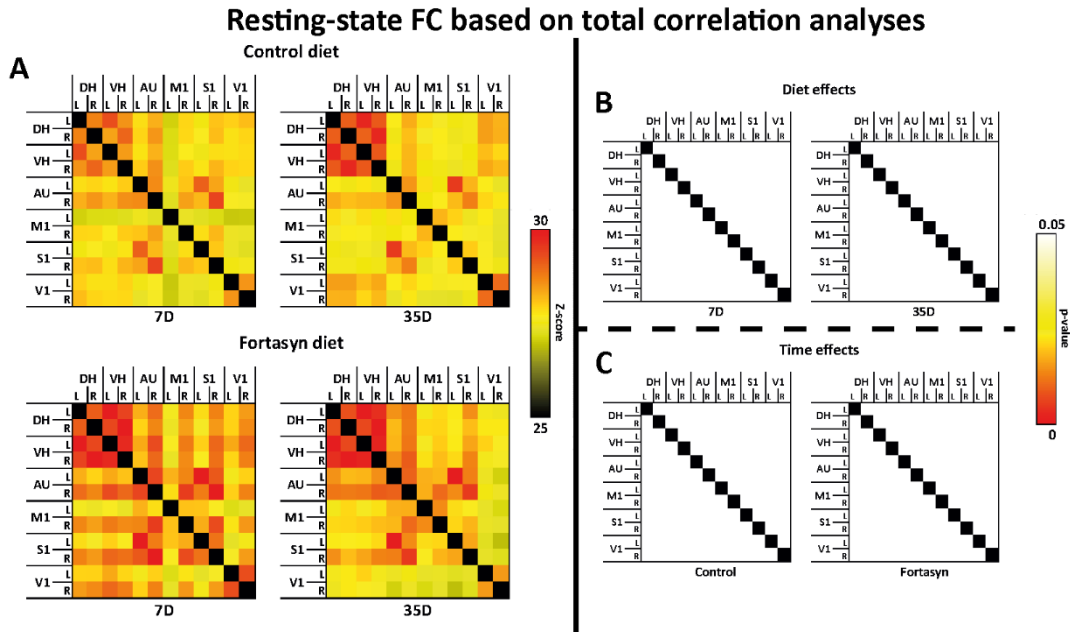

53  
 54 **Supplemental fig. 2. Resting-state functional connectivity (FC) based on total correlation**  
 55 **analyses (A) in the brains of mice fed Fortasyn or Control diet 7 and 35 days poststroke. FC was**  
 56 **measured between 12 ROI: dorsal hippocampus (DH), ventral hippocampus (VH), auditory**  
 57 **cortex (AU), motor cortex (M1), somatosensory cortex (S1), and visual cortex (V1). (A-C) No**  
 58 **significant diet effects were found with total correlations 7 and 35 days poststroke.**

59  
 60 *Immunohistochemical stainings (Nijmegen, The Netherlands)*

61  
 62 For each treatment and ROI a photo is given for each immunohistochemical staining: Glucose  
 63 transporter-1 (*supplemental figure 3*), ionized calcium-binding adapter molecule 1 (*supplemental*  
 64 *figure 4*), doublecortin (*supplemental figure 5*), synaptophysin (*supplemental figure 6*), postsynaptic  
 65 Density-95 Protein (*supplemental figure 7*).

66  
 67 *Glucose transporter-1*

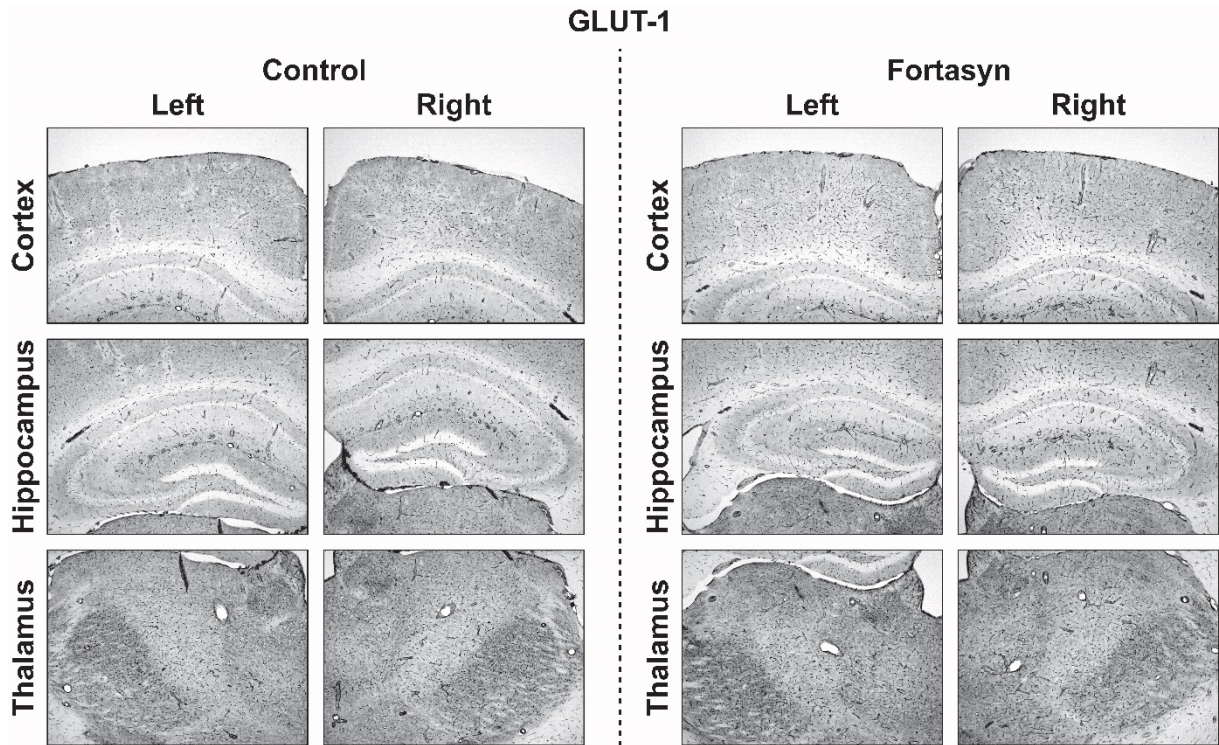

68  
69 **Supplemental fig. 3. Immunohistochemical stainings for glucose transporter-1 on brains of**  
70 **Fortasyn and Control fed mice 35 days after tMCAo.** One representative photo for each single  
71 condition (Control or Fortasyn) for each left and right region of interest (cortex, hippocampus,  
72 thalamus) is shown.

73  
74  
75 *Ionized calcium-binding adapter molecule 1*

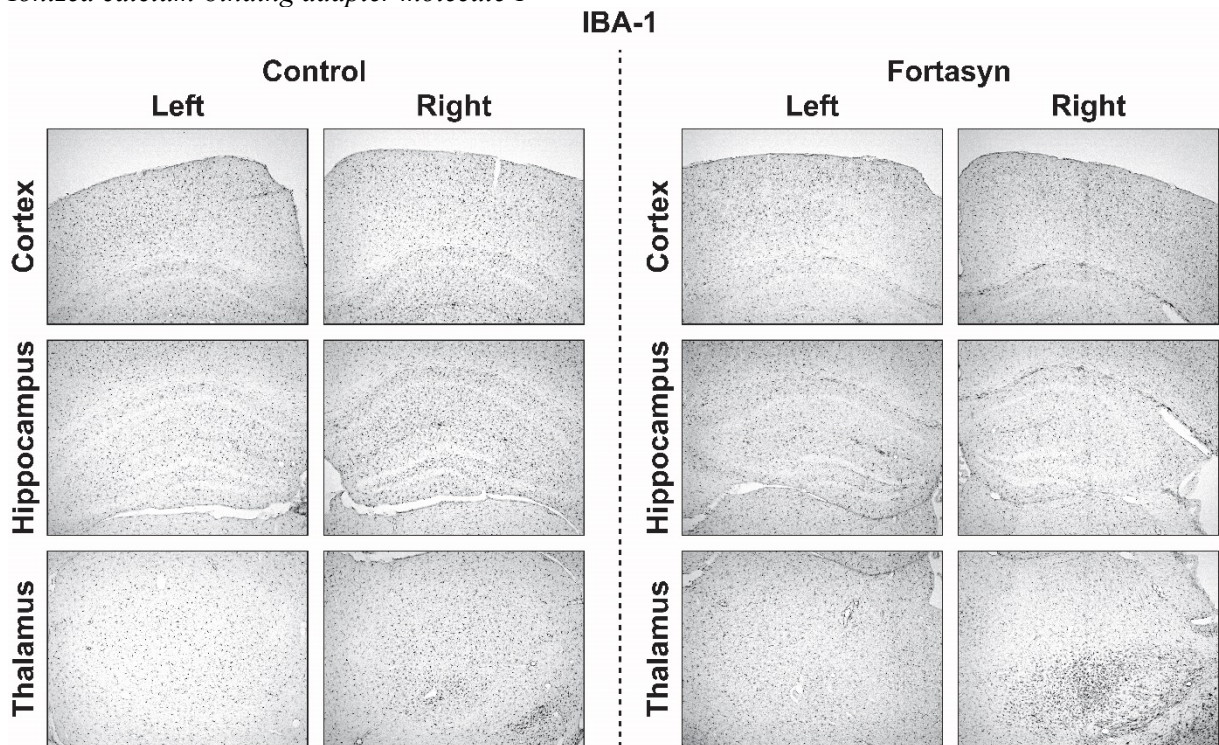

76  
77 **Supplemental fig. 4. Immunohistochemical stainings for ionized calcium-binding adapter**  
78 **molecule 1 (IBA-1) on brains of Fortasyn and Control fed mice 35 days after tMCAo.** One



79 representative photo for each single condition (Control or Fortasyn) for each left and right region of  
80 interest (cortex, hippocampus, thalamus) is shown.

81

82 *Doublecortin*

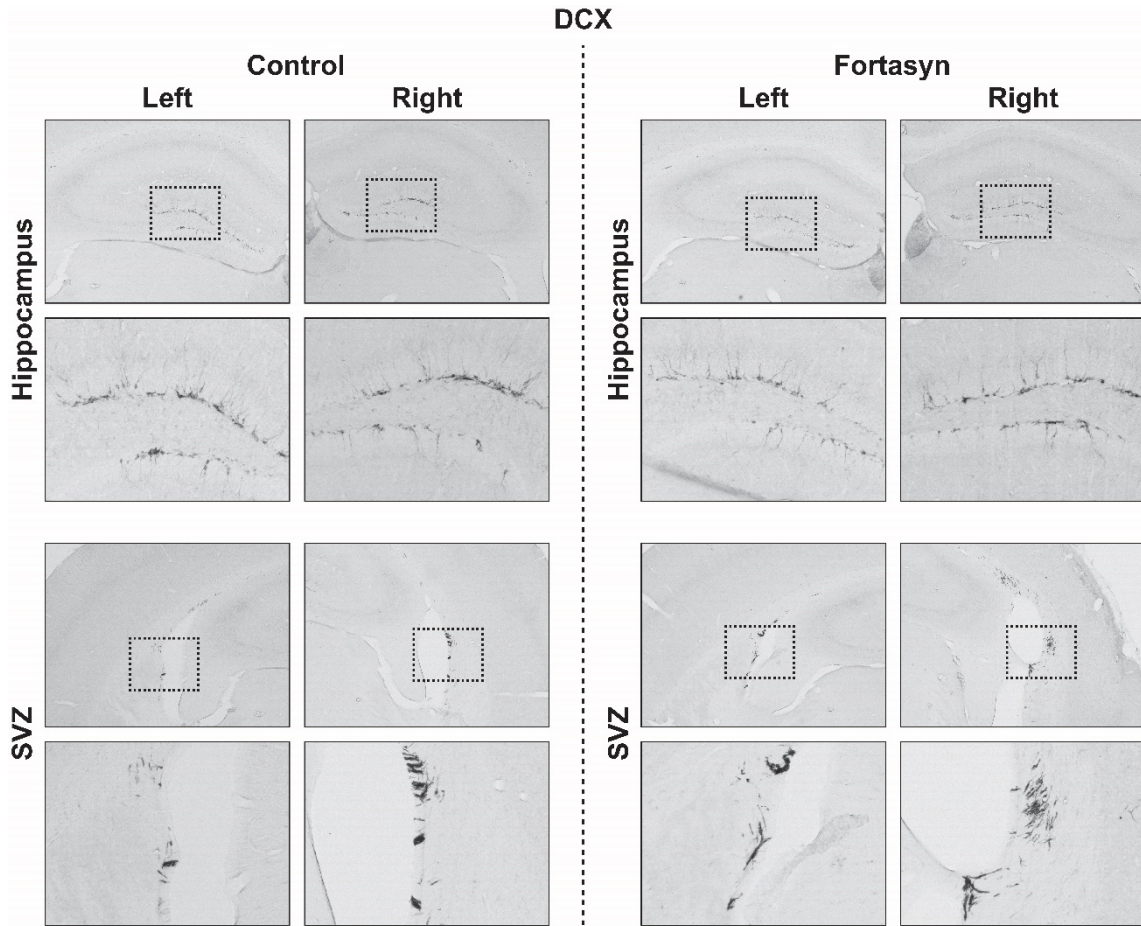

83

84 **Supplemental fig. 5. Immunohistochemical stainings for doublecortin (DCX) on brains of**  
85 **Fortasyn and Control fed mice 35 days after tMCAo. One representative photo for each single**  
86 **condition (Control or Fortasyn) for each left and right region of interest (hippocampus, subventricular**  
87 **zone (SVZ)) is shown.**

88

89

90 *Synaptophysin*

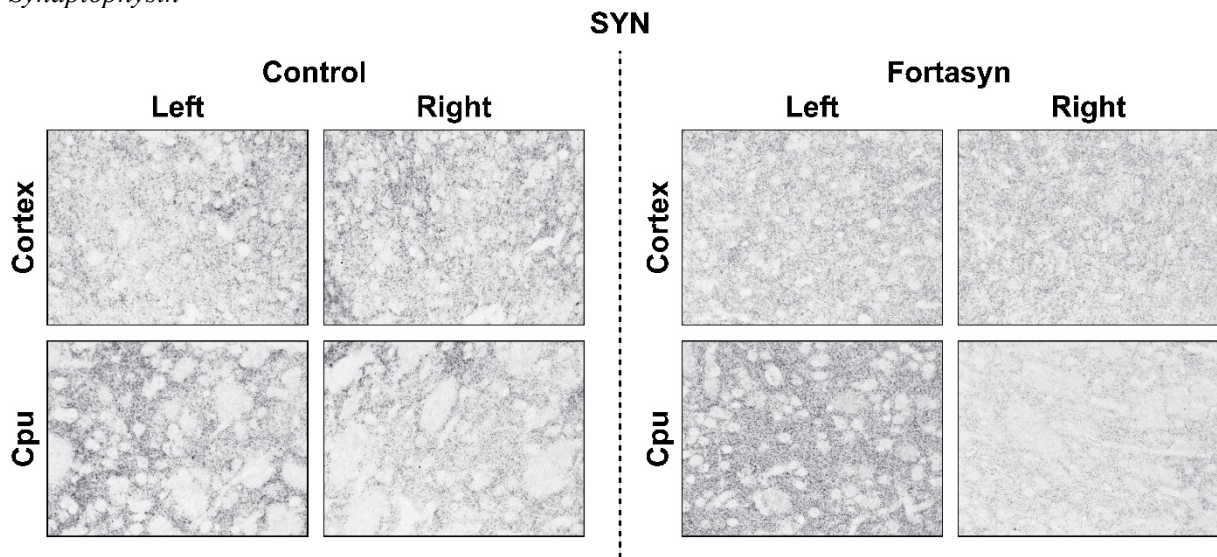

91

92 **Supplemental fig. 6. Immunohistochemical stainings for synaptophysin (SYN) on brains of**  
93 **Fortasyn and Control fed mice 35 days after tMCAo.** One representative photo for each single  
94 condition (Control or Fortasyn) for each left and right region of interest (hippocampus, caudate  
95 putamen (Cpu)) is shown.

96  
97 *Postsynaptic Density-95 Protein*

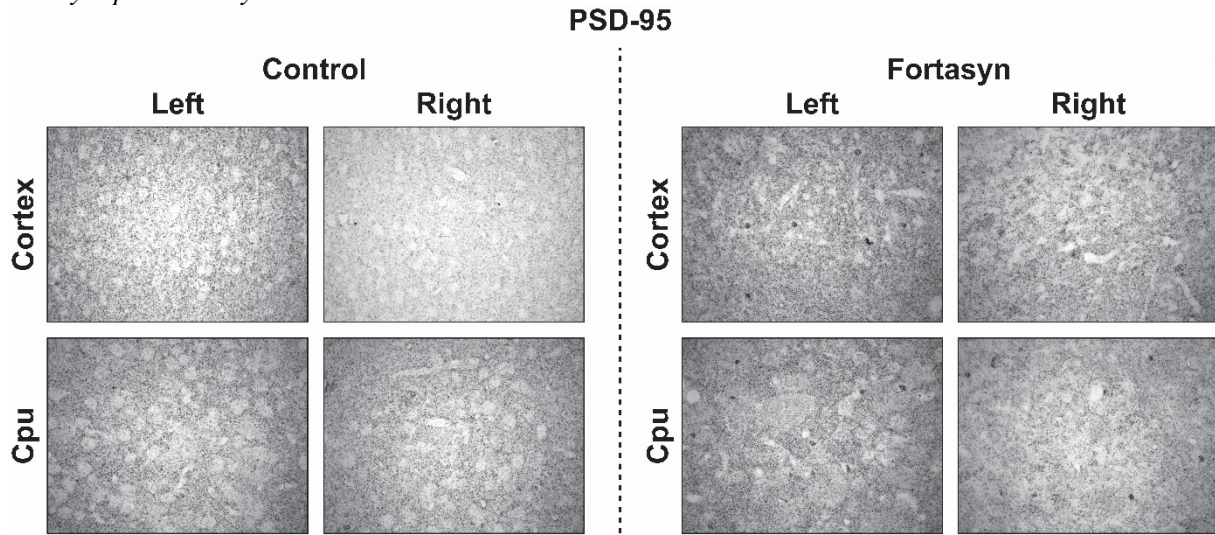

98  
99 **Supplemental fig. 7. Immunohistochemical stainings for postsynaptic Density-95 Protein (PSD-**  
100 **95) on brains of Fortasyn and Control fed mice 35 days after tMCAo.** One representative photo for each single  
101 condition (Control or Fortasyn) for each left and right region of interest (hippocampus,  
102 caudate putamen (Cpu)) is shown.

103  
104  
105 **Materials and methods**

106  
107 *Sample size calculation*

108 A sample size of minimal 5 mice per subgroup (Fortasyn & Control) was chosen based on power  
109 calculation based on results from our previous study (18 months old ApoE4: Control vs Fortasyn), in  
110 which we calculated functional connectivity averages and standard deviations of the Control  
111 ( $35.0 \pm 1.4$ ) and Fortasyn mice ( $37.6 \pm 1.5$ ) between right auditory and right somatosensory cortex being  
112 needed for the effect size calculation for this recent study ( $d=1.79$ ). A power analysis has been  
113 performed with alpha level (or the Type I error rate,  $\alpha=0.05$ ), statistical power ( $1-\beta$ , 0.80), an  
114 assumption of equal sized sample groups ( $N1$  to  $N2$  is 1), and the calculated effect size (1.79):  
115 minimal  $n=5$  per group (actual power: 0.93) after experimental stroke. Due to exclusion criteria or  
116 unexpected mortality after the induction of an experimental stroke, minimal  $n=12$  per surgical group.

117  
118  
119 *Rotarod*

120  
121 In order to study motor coordination Rotarod was performed prior to the tMCAo (training), and also 8  
122 and 21 days poststroke (for a more detailed description see [1]. Mice were placed on a rotating rod  
123 (3.18 cm in diameter; IITC Inc., Woodland Hills, CA, USA) and their ability to stay on the drum was  
124 recorded as latency to fall (s). Trials were performed at both fixed speed (10, 15 and 20 rpm) and  
125 accelerated speed (4–40 rpm).

126  
127 *Prepulse inhibition*

128  
129 To examine sensorimotor integration, as previously described [2, 3], startle reactivity was measured in  
130 a startle response system, the SR-LAB (San Diego Instruments, San Diego, CA, USA), at 16 days

131 poststroke. The whole-body startle response of the mouse was calculated during three blocks of startle  
132 pulses. A detailed description of the testing session can be found in [2].

133

#### 134 *Novel object recognition test (ORT)*

135

136 All mice underwent ORT to measure short term memory at 22 to 24 days poststroke. First, all mice  
137 acclimatized for 10 minutes to the open field box. At the next acquisition day, each mouse started with  
138 the familiarization trial. Before this trial, two identical objects equidistant from the center were placed  
139 in the open field. The mouse was then placed into the open field for four minutes to freely explore the  
140 two identical objects (F1 and F2). After 30 minutes delay (first acquisition day) respectively 60  
141 minutes delay (second acquisition day) after the familiarization trial, another copy of the previous  
142 familiar objects (F3) and one novel (N1) object of the previous trial was placed in the open field. Now  
143 again, the mouse had 4 minutes to explore the two different objects (F3 and N1). Using EthoVision  
144 XT10.1 (Noldus, Wageningen, The Netherlands), exploratory behaviour was measured as direct  
145 contact with the object or in a zone around the object at distance less than 2 cm. For the results,  
146 recognition memory was measured using a recognition index being calculated as the time spent  
147 exploring N1 minus the time spent exploring F3:  $[N1-F1]$  [4].

148

149

#### 150 **References**

151

152 1. Janssen CIF, Zerbi V, Mutsaers MPC, de Jong BSW, Wiesmann M, Arnoldussen IAC, et al. Impact of  
153 dietary n-3 polyunsaturated fatty acids on cognition, motor skills and hippocampal neurogenesis in developing  
154 C57BL/6J mice. *The Journal of Nutritional Biochemistry*. 2015; 26: 24-35.

155 2. Janssen CIF, Zerbi V, Mutsaers MPC, Jochems M, Vos CA, Vos JO, et al. Effect of perinatally  
156 supplemented flavonoids on brain structure, circulation, cognition, and metabolism in C57BL/6J mice.  
157 *Neurochemistry International*. 2015; 89: 157-69.

158 3. Streijger F, Oerlemans F, Ellenbroek BA, Jost CR, Wieringa B, Van der Zee CEEM. Structural and  
159 behavioural consequences of double deficiency for creatine kinases BCK and UbCKmit. *Behavioural Brain*  
160 *Research*. 2005; 157: 219-34.

161 4. Muñoz PC, Aspé MA, Contreras LS, Palacios AG. Correlations of recognition memory performance  
162 with expression and methylation of brain-derived neurotrophic factor in rats. *Biological Research*. 2010; 43:  
163 251-8.

164
